# Supplementary material for: Nitridation of Cr–urea complex into nanocrystalline CrN and its antiferromagnetic magnetostructural transition study
Source: Royal Society of Chemistry journal article supplement (doi:10.1039/d2nj03765c), 2022-01-01
Supplement: d2nj03765c1.pdf [file d2nj03765c1.pdf]

## Electronic Supplementary Information

### Nitridation of Cr-urea complex into nanocrystalline CrN and its antiferromagnetic magnetostructural transition study

Dadan Singh<sup>a</sup>, Saumya Tamrakar<sup>a</sup>, Kamlesh Shrivastava<sup>b\*</sup>, Khemchand Dewangan<sup>\*a</sup>

<sup>a</sup>Department of Chemistry, Indira Gandhi National Tribal University, Amarkantak-484887, MP, India

<sup>b</sup>School of Studies in Chemistry, Pt. Ravishankar Shukla University, Raipur-492010, CG, India

\*Corresponding authors: [khemchand.dewangan@igntu.ac.in](mailto:khemchand.dewangan@igntu.ac.in) (KD), [kshrivas@gmail.com](mailto:kshrivas@gmail.com) (KS)

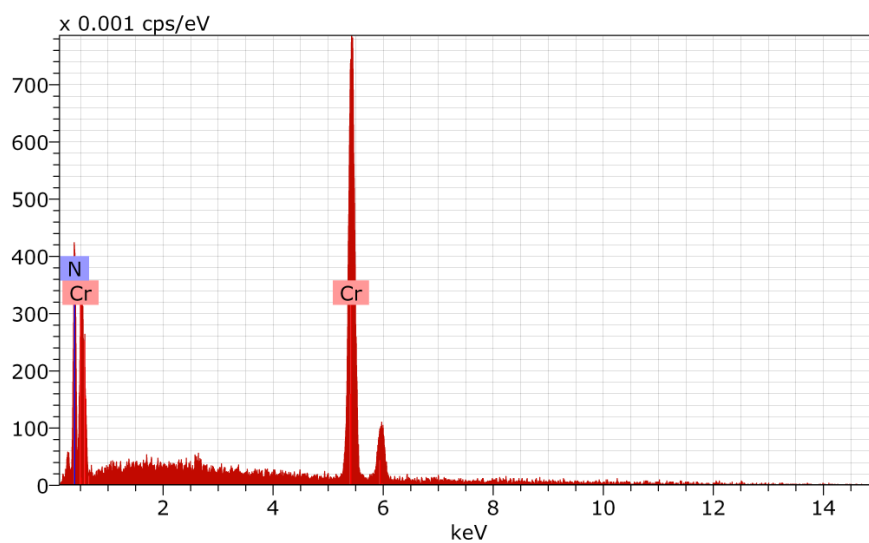

**Fig. S1** EDX spectrum of CrN nanoparticles.

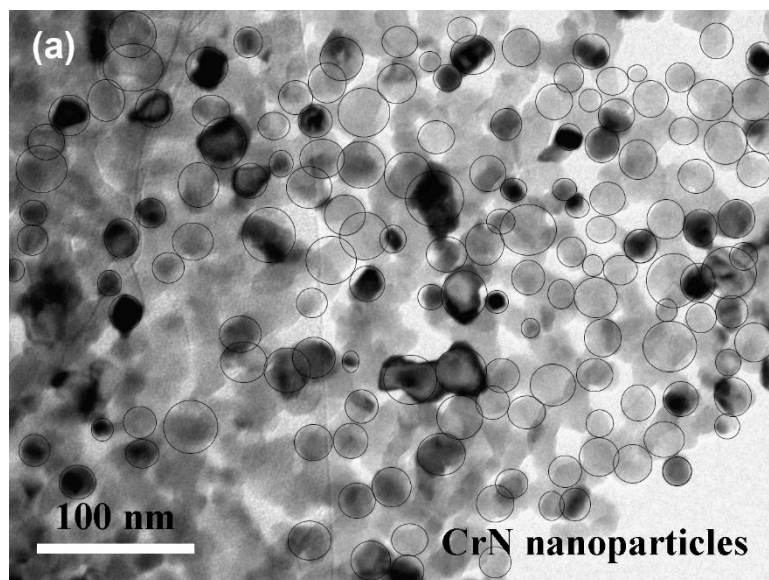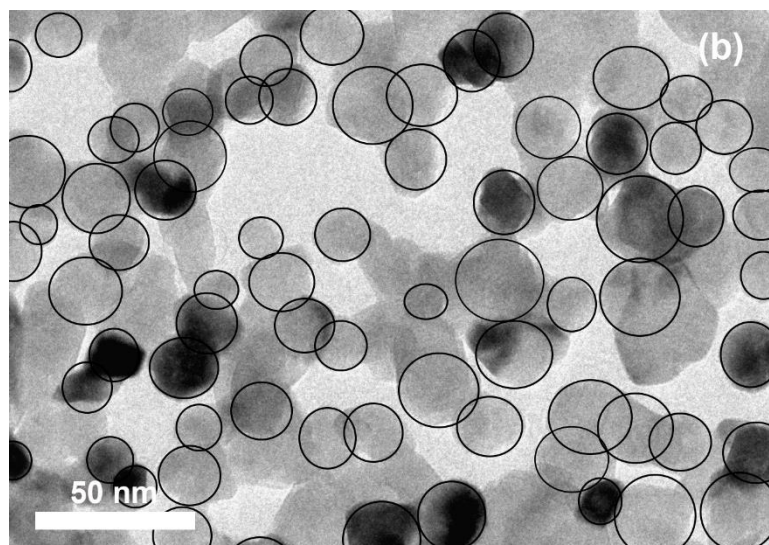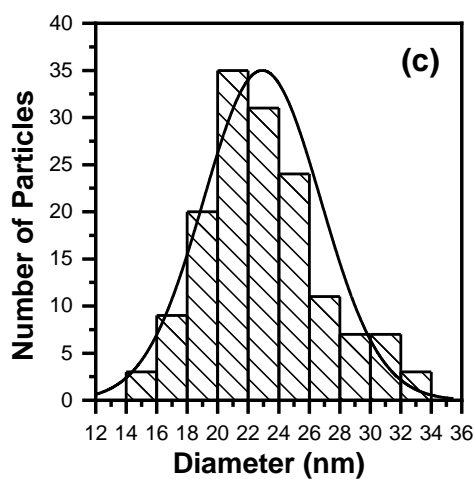

**Fig. S2** (a) Low and (b) high magnified TEM images of CrN nanoparticles. (c) Histogram for the particle size distribution of CrN nanoparticles.

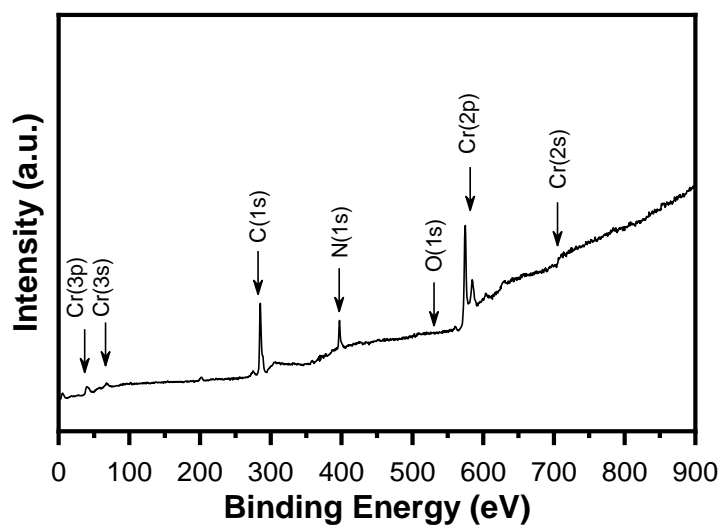

**Fig. S3** XPS survey spectrum of CrN nanoparticles.

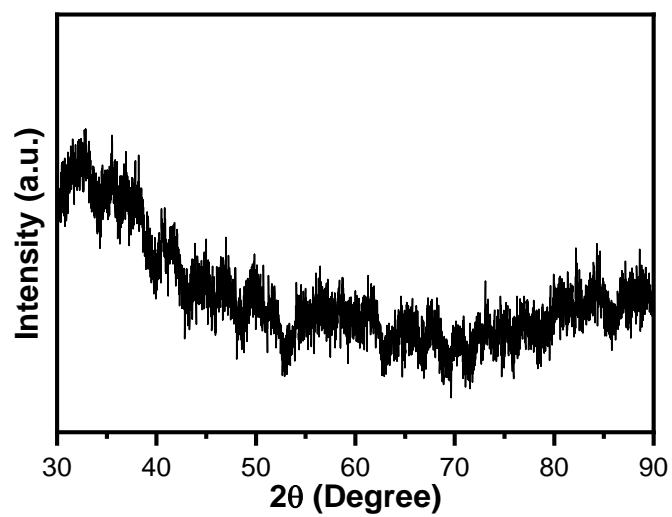

**Fig. S4** XRD pattern of the product obtained after 350 °C heated Cr-Urea complex.

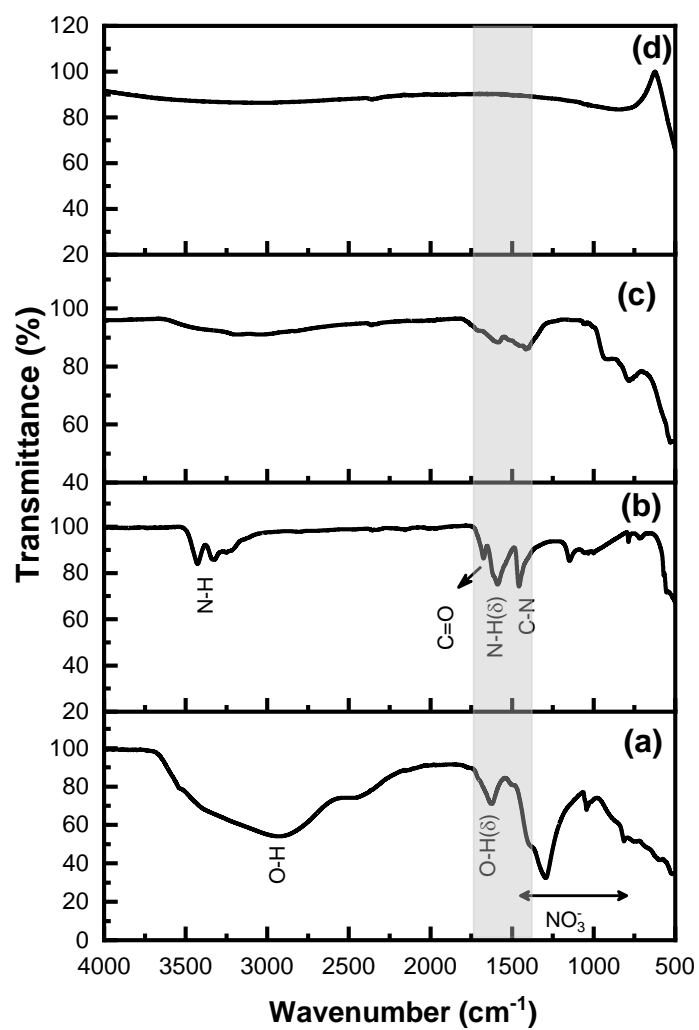

**Fig. S5.** FTIR spectra: (a) Cr(NO<sub>3</sub>)<sub>3</sub>·9H<sub>2</sub>O, (b) NH<sub>2</sub>CONH<sub>2</sub> (urea), (c) precursor, and (d) CrN nanoparticles.

**Table S1:** IR frequencies and band assignments for the  $\text{Cr}(\text{NO}_3)_3 \cdot 9\text{H}_2\text{O}$ ,  $\text{NH}_2\text{CONH}_2$ , precursor, and CrN nanoparticles. ( $\nu$  and  $\delta$  are the stretching and bending vibration modes, respectively)

| Compounds                                            | Wavenumber ( $\text{cm}^{-1}$ ) | Band assignment                                     | References              |
|------------------------------------------------------|---------------------------------|-----------------------------------------------------|-------------------------|
| $\text{Cr}(\text{NO}_3)_3 \cdot 9\text{H}_2\text{O}$ | ~ 3000                          | $\nu(\text{O-H})$ of $\text{H}_2\text{O}$           | [1]                     |
|                                                      | 1627                            | $\delta(\text{O-H})$ of $\text{H}_2\text{O}$        | [1]                     |
|                                                      | 1385                            | $\nu(\text{N=O})$ of $\text{NO}_3^-$                | [2-3]                   |
|                                                      | 1294                            | $\nu_{\text{asym}}(\text{NO}_2)$ of $\text{NO}_3^-$ | [2-3]                   |
|                                                      | 1044                            | $\nu_{\text{sym}}(\text{NO}_2)$ of $\text{NO}_3^-$  | [2-3]                   |
|                                                      | 814                             | $\delta(\text{NO}_2)$ of $\text{NO}_3^-$            | [2-3]                   |
| $\text{NH}_2\text{CONH}_2$                           | 3428                            | $\nu_{\text{asym}}(\text{NH}_2)$                    | [4]                     |
|                                                      | 3328                            | $\nu_{\text{sym}}(\text{NH}_2)$                     | [4]                     |
|                                                      | 1675                            | $\nu(\text{C=O})$                                   | [4]                     |
|                                                      | 1588                            | $\delta(\text{NH}_2)$                               | [4]                     |
|                                                      | 1455                            | $\nu\text{C-N}$                                     | [4]                     |
| Precursor                                            | 778<br>927                      | Cr-O-N/Cr-N                                         | present work            |
| CrN nanoparticles                                    | ~600                            | Cr-N                                                | [5-7] and present work. |

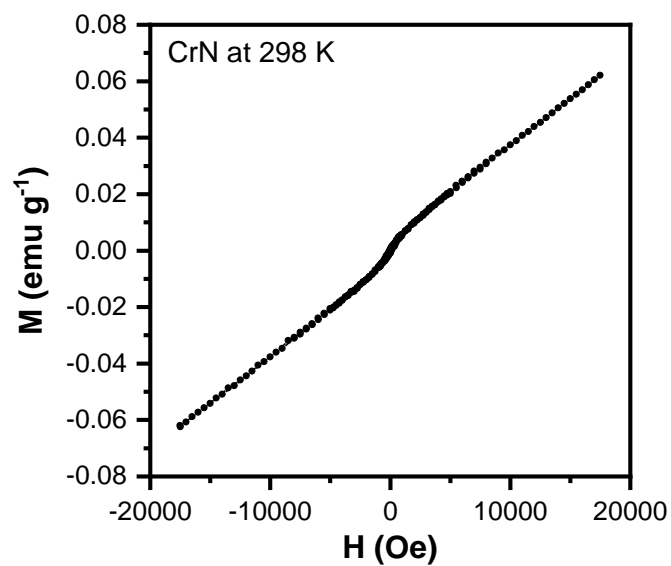

**Fig. S6** Magnetization versus magnetic field (M-H) curve of CrN nanoparticles.

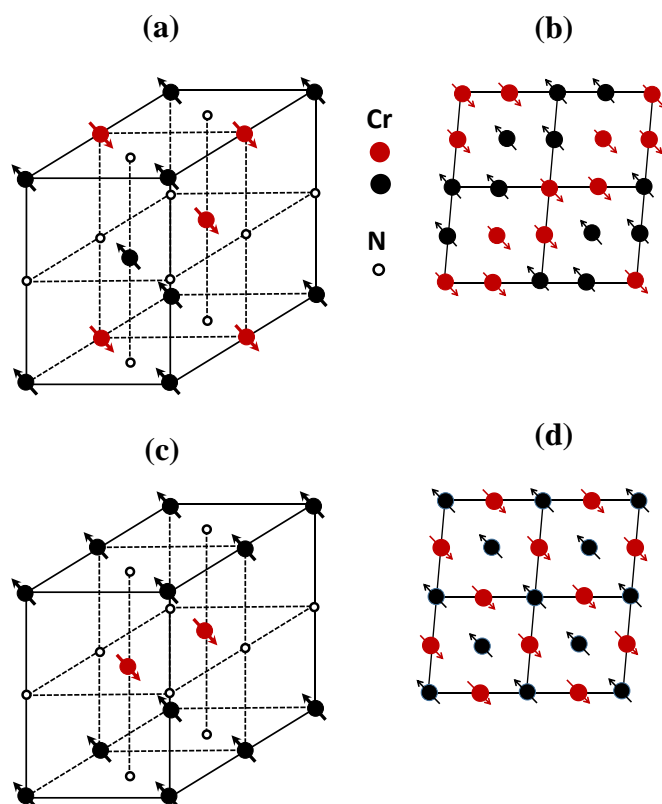

**Fig. S7** Orthorhombic unit cell of CrN (four formula units): (a) and (b) AFM-[110]<sub>2</sub> ordering. (c) and (d) are the AFM-[110]<sub>1</sub> ordering.

## References:

- [1] X. Hou, K.-L. Choy, N. Brun and V. Serín, Nanocomposite coatings codeposited with nanoparticles using aerosol-assisted chemical vapour deposition. *J. Nanomater.* **2013**, *2013*, 219039.
- [2] L. V. Volod'ko and L. T. Huoah, The vibrational spectra of aqueous nitrate solutions. *J. Appl. Spectrosc.* **1968**, *9*, 1100-1104.
- [3] L. Gubrynowicz and T. Strömich, Study on the thermal decomposition of chromium(III) nitrate nonahydrate (CNN). *Thermochim. Acta* **1987**, *115*, 137-151.
- [4] M. L. Bai, S. Zhao and S. Asuha, Synthesis and thermal decomposition of Cr–urea complex. *J. Therm. Anal. Calorim.* **2014**, *115*, 255-258.
- [5] M. Hirai, T. Suzuki, H. Suematsu, W. Jiang and K. Yatsui, Mechanism of hardening in Cr–Al–N–O thin films prepared by pulsed laser deposition. *J. Vac. Sci. Technol. A* **2003**, *21*, 947-954.
- [6] O. Banakh, P. E. Schmid, R. Sanjinés and F. Lévy, High-temperature oxidation resistance of Cr<sub>1-x</sub>Al<sub>x</sub>N thin films deposited by reactive magnetron sputtering. *Surf. Coat. Technol.* **2003**, *163-164*, 57-61.
- [7] K. S. Weil, The synthesis of transition metal nitrides via thermolysis of metal–ammine complexes, Part I: Chromium nitride. *J. Solid State Chem.* **2008**, *181*, 199-210.
